# Supplementary material for: Urban Sustainability: Recovering and Utilizing Urban Excess Heat
Source: MDPI journal article supplement (doi:10.3390/en15249466), 2022-12-14
Supplement: s1 [file s1]

## SUPPLEMENTARY MATERIALS

### Urban Sustainability: Recovering and Utilizing Urban Excess Heat

Kristina Lygnerud <sup>1,2,\*</sup> and Sarka Langer <sup>1</sup>

<sup>1</sup> IVL Swedish Environmental Research Institute, SE-400 14 Göteborg, Sweden

<sup>2</sup> Department of Energy Sciences, Efficient Energy Systems, Faculty of Engineering LTH, Lund University, SE-221 00 Lund, Sweden

#### The calculation Tool for comparison of costs of alternatives for heating

An excel-based calculation tool (here called as ‘Tool’) has been developed by ReUseHeat. The main objective of the Tool is to provide a way to test different assumptions impacting the cost of heating associated with different heating solution rather than to provide solid LCOH estimations. The Tool includes all relevant factors to compare LCOH of different heating solutions but also has several limitations and simplifications. The structure and contents of the tool are inspired by other, similar tools but adjusted to the specifics of the ReUseHeat project

The results obtained by applying that Tool compare the costs of different heat supply options in the three countries hosting the ReUseHeat demonstrators. The Tool calculates Levelized Cost of Heat (LCOH based on Equation S1:

$$\text{LCOH} = \frac{\sum_{t=0}^T \left( \frac{C_{\text{Inv}_t} + C_{\text{O\&M}_t} + C_{\text{fuel}_t} + C_{\text{tax}_t} + C_{\text{env}_t}}{(1+r)^t} \right)}{\sum_{t=0}^T (\text{MWh}_t)} \quad \text{Eq.S1}$$

where  $C_{\text{Inv}_t}$  is the sum of all capital expenditures,  $C_{\text{O\&M}_t}$  is the sum of operational and maintenance costs,  $C_{\text{fuel}_t}$  is the cost of fuel,  $C_{\text{tax}_t}$  is the sum of all taxes paid and  $C_{\text{env}_t}$  is expenditures related to the environmental impact of the heating solution, all in year  $t$ .  $(1+r)^t$  is the discount factor in year  $t$  with a discount rate  $r$ .  $\text{MWh}_t$  is the total amount of heat supplied to the household by a heating solution in year  $t$ .  $T$  is the number of years in the period studied.

The capital expenditures include both the investment cost (unit, installation, and commissioning) of the heating equipment (for the DH connection, the cost of the heat exchanger) and the cost of connecting the solution to the house. The operation and maintenance (O&M) costs include fixed and variable costs as well as the capacity fee.

The capacity fee reflects the cost for the DH provider carries for having the required capacity available for its consumer. The fuel cost for a) gas- and biomass-fired boilers is the price of gas and biomass, respectively; b) for electric heaters and heat pumps is the price of consumed electricity and c) for customers connected to high- and low-temperature DH is the cost of heating that the homeowner pays for the consumed heat. The environmental cost is the cost

for the emitted CO<sub>2</sub>, i.e., the emission factor for the fuel, electricity or DH is multiplied by the price of CO<sub>2</sub> and the fuel consumed for generating the required heat.

### **Assumptions and inputs in the Tool**

The assumptions and inputs included in the Tool can be categorised into three groups: a) general (relevant to all the technologies and all the countries); b) technology-specific; c) technology- and country-specific. All of the assumptions and inputs can be changed by the user.

#### **General assumptions**

The calculations are performed for a single-family house with an average yearly heating demand of 15 MWh. The capacity of the heat generation/supply unit (for the DH connections, the heat supply unit is the heat exchanger on the building side) is 20 kW. The investment year is 2020. The lifetime of the heat generation/supply units is 20 years. The discount rate is 5%. The price of CO<sub>2</sub> emissions is assumed to increase from around 30 €/tCO<sub>2</sub> in 2020 to around 125 €/tCO<sub>2</sub> in 2040 (corresponding to the WEO (World Energy Outlook) estimates for “advanced economies” in the Sustainable Development scenario [S1]).

#### **Technology-specific assumptions**

The technology-specific parameters that, in this study, differ among the investigated individual heating solutions but are assumed to have identical values for each investigated country are as follows: investment cost (€/kW), fixed O&M cost (€/yr), variable O&M cost (€/kWh), energy conversion efficiency, and CO<sub>2</sub> emissions factors for biomass, natural gas, oil (tCO<sub>2</sub>/kWh of fuel). The values for these parameters assumed in this study are mainly based on the information available in the Danish Technology Catalogue [S2] but were also updated based on the data in other sources [S3].

#### **Technology- and country-specific assumptions**

The technology- and country-specific parameters included in the LCOH calculations are as follows: fuel/electricity/heat price (€/kWh), capacity fee (€/kW), VAT (€/kWh), other taxes and levies (€/kWh), yearly average CO<sub>2</sub> emissions factors of electricity generation applied to electric boilers and heat pumps, CO<sub>2</sub> emissions factors of DH-supplied heat (tCO<sub>2</sub>/kWh of fuel), and investment, fixed, and variable O&M costs for the high- and low-temperature DH connections. The values for these parameters were checked and updated by the ReUseHeat partners in each demonstration site country. The yearly average CO<sub>2</sub> emissions factors of electricity generation in the investigated countries were taken from the dataset compiled by the European Environment Agency [S4]. The average CO<sub>2</sub> emission factor of heat generation in the DH systems in Germany [S5] was assumed identical in Spain and France. All of the inputs together with the different heating solution are shown in Tables S2, S3 and S4. Figures S3 – S5 present the results of the calculations.

**Table S1.** Excess heat source types, recovery types, temperature ranges, temporality and the HP conversion type for the investigated heat sources.

| Excess heat source type      | Source of excess heat recovery             | Temperature range °C | Seasonal temporality | Heat pump conversion |
|------------------------------|--------------------------------------------|----------------------|----------------------|----------------------|
| Data centers                 | Server room air cooling systems            | 25 - 35              | Principally constant | Air to water         |
| Metro stations               | Platform ventilation exhaust air           | 5 - 35               | Variable             | Air to water         |
| Waste-water treatment plants | Post-treatment sewage water                | 8 - 15               | Principally constant | Water to water       |
| Service sector buildings     | Central cooling device                     | 30 - 40              | Variable             | Liquid to water      |
| Residential sector buildings | Central cooling device                     | 30 - 40              | Variable             | Liquid to water      |
| Food production facilities   | Rejected heat from refrigeration processes | 20 - 40              | Principally constant | Liquid to water      |
| Food retail stores           | Rejected heat from refrigeration processes | 40 - 70              | Principally constant | ---                  |

**Table S2.** The techno-economic parameters assumed for the LCOH calculation of the individual and DH technologies - Germany.

| GERMANY                      | Unit                        | Gas boiler | Biomass boiler | Oil boiler | Electric boiler | Air-to-water HP | Brine-to-water HP | High-temp DH | Low-temp DH |
|------------------------------|-----------------------------|------------|----------------|------------|-----------------|-----------------|-------------------|--------------|-------------|
| Unit size                    | kW                          | 20         | 20             | 20         | 20              | 20              | 20                | 20           | 20          |
| Investment year              | -                           | 2020       | 2020           | 2020       | 2020            | 2020            | 2020              | 2020         | 2020        |
| Single unit ivestment        | EUR                         | 6440       | 10740          | 7515       | 4965            | 12485           | 20000             | 5320         | 5320        |
| Single unit fix O&M cost     | EUR/yr                      | 255        | 605            | 295        | 65              | 360             | 360               | 80           | 80          |
| Connection cost              | EUR/kW                      | 0          | 0              | 0          | 0               | 0               | 0                 | 270          | 270*        |
| Var. O&M                     | EUR/MWh                     | 1          | 1              | 1          | 1               | 1               | 1                 | 4            | 4           |
| Fuel /electricity /DH price  | EUR/MWh_fuel                | 43         | 48             | 46         | 150             | 150             | 150               | 50           | 40          |
| Capacity fee                 | EUR/kW                      | 6          | 0              | 0          | 0               | 0               | 0                 | 11.95        | 11.95       |
| VAT                          | EUR/MWh_fuel                | 9          | 3              | 10         | 50              | 50              | 50                | 10           | 10          |
| Taxes and levies (excl. VAT) | EUR/MWh_fuel                | 11         | 0              | 6          | 115             | 115             | 115               | 0            | 0           |
| Fixed O&M                    | EUR/kW                      | 12.8       | 30.3           | 14.8       | 3.3             | 18              | 18                | 4            | 4           |
| Total efficiency             |                             | 0.92       | 0.8            | 0.92       | 1               | 2.89            | 4.09              | 0.95         | 0.95        |
| Lifetime                     | years                       | 20         | 20             | 20         | 20              | 20              | 20                | 20           | 20          |
| Emission factor              | kgCO <sub>2</sub> /MWh_fuel | 204        | 0              | 285        | 311             | 311             | 311               | 100          | 50          |

\* The connection to a low-temperature DH network might be a bit higher compared to the cost of the high-temperature DH connection as there is a higher investment in the infrastructure necessary (larger pipe diameters, etc.). However, this was not considered in our analysis due to the lack of data.

The input data for the calculation of the levelized cost of heat (LCOH) in Germany can be found in Supporting references [S6-S13].

**Table S3.** The techno-economic parameters assumed for the LCOH calculation of the individual and DH technologies – Spain.

| SPAIN                             | Unit                        | Gas boiler | Biomass boiler | Oil boiler | Electric boiler | Air-to-water HP | Brine-to-water HP | High-temp DH | Low-temp DH |
|-----------------------------------|-----------------------------|------------|----------------|------------|-----------------|-----------------|-------------------|--------------|-------------|
| Unit size                         | kW                          | 20         | 20             | 20         | 20              | 20              | 20                | 20           | 20          |
| Investment year                   | -                           | 2020       | 2020           | 2020       | 2020            | 2020            | 2020              | 2020         | 2020        |
| Single unit investment            | EUR                         | 6440       | 10740          | 7515       | 4965            | 12485           | 20000             | 6175         | 6175        |
| Single unit fix O&M cost          | EUR/yr                      | 255        | 605            | 295        | 65              | 360             | 360               | 65           | 65          |
| Connection cost                   | EUR/kW                      | 0          | 0              | 0          | 0               | 0               | 0                 | 200          | 200*        |
| Var. O&M                          | EUR/MWh                     | 1          | 1              | 1          | 1               | 1               | 1                 | 1            | 1           |
| Fuel /electricity /DH price       | EUR/MWh_fuel                | 52         | 45             | 81         | 133             | 133             | 133               | 59           | 47          |
| Capacity fee                      | EUR/kW                      | 0          | 0              | 0          | 0               | 0               | 0                 | 0            | 0           |
| VAT                               | EUR/MWh_fuel                | 11         | 9              | 17         | 40              | 40              | 40                | 12           | 10          |
| Supporting references (excl. VAT) | EUR/MWh_fuel                | 2.3        | 0              | 2.3        | 60              | 60              | 60                | 0            | 0           |
| Fixed O&M                         | EUR/kW                      | 12.8       | 30.3           | 14.8       | 3.3             | 18              | 18                | 3.3          | 3.3         |
| Total efficiency                  |                             | 0.92       | 0.8            | 0.92       | 1               | 2.33            | 2.63              | 0.95         | 0.95        |
| Lifetime                          | years                       | 20         | 20             | 20         | 20              | 20              | 20                | 20           | 20          |
| Emission factor                   | kgCO <sub>2</sub> /MWh_fuel | 204        | 0              | 285        | 156             | 156             | 156               | 100          | 50          |

\* The connection to a low-temperature DH network might be a bit higher compared to the cost of the high-temperature DH connection as there is a higher investment in the infrastructure necessary (larger pipe diameters, etc.). However, this was not considered in our analysis due to the lack of data.

Sources of the input data for the calculation of the levelized cost of heat (LCOH) in Spain are included in Supporting references [S12-S16].

**Table S4.** The techno-economic parameters assumed for the LCOH calculation of the individual and DH technologies – France.

| FRANCE                       | Unit                        | Gas boiler | Biomass boiler | Oil boiler | Electric boiler | Air-to-water HP | Brine-to-water HP | High-temp DH | Low-temp DH |
|------------------------------|-----------------------------|------------|----------------|------------|-----------------|-----------------|-------------------|--------------|-------------|
| Unit size                    | kW                          | 20         | 20             | 20         | 20              | 20              | 20                | 20           | 20          |
| Investment year              | -                           | 2020       | 2020           | 2020       | 2020            | 2020            | 2020              | 2020         | 2020        |
| Single unit investment       | EUR                         | 6440       | 10740          | 7515       | 4965            | 12485           | 20000             | -            | -           |
| Single unit fix O&M cost     | EUR/yr                      | 255        | 605            | 295        | 65              | 360             | 360               | -            | -           |
| Connection cost              | EUR/kW                      | 0          | 0              | 0          | 0               | 0               | 0                 | 240          | 240*        |
| Var. O&M                     | EUR/MWh                     | 1          | 1              | 1          | 1               | 1               | 1                 | 18           | 18          |
| Fuel /electricity /DH price  | EUR/MWh_fuel                | 47         | 45             | 78         | 126             | 126             | 126               | 55           | 44          |
| Capacity fee                 | EUR/kW                      | 0          | 0              | 0          | 0               | 0               | 0                 | 35           | 35          |
| VAT                          | EUR/MWh_fuel                | 9          | 3              | 15         | 26              | 26              | 26                | 10.45        | 8.4         |
| Taxes and levies (excl. VAT) | EUR/MWh_fuel                | 10         | 0              | 2          | 40              | 40              | 40                | 0            | 0           |
| Fixed O&M                    | EUR/kW                      | 12.8       | 30.3           | 14.8       | 3.3             | 18              | 18                | 0            | 0           |
| Total efficiency             |                             | 0.92       | 0.8            | 0.92       | 1               | 2.89            | 4.09              | 0.95         | 0.95        |
| Lifetime                     | Years                       | 20         | 20             | 20         | 20              | 20              | 20                | 20           | 20          |
| Emission factor              | kgCO <sub>2</sub> /MWh_fuel | 204        | 0              | 285        | 51              | 51              | 51                | 100          | 50          |

\* The connection to a low-temperature DH network might be a bit higher compared to the cost of the high-temperature DH connection as there is a higher investment in the infrastructure necessary (larger pipe diameters, etc.). However, this was not considered in our analysis due to the lack of data.

Sources of the input data for the calculation of the levelized cost of heat (LCOH) in France are included in Supporting references [S12-13, S17].

**Table S5.** Sources of urban excess heat, number of source units within the distance of two kilometers from a DHN and energy data (in the unit of PJ/year).

| Source of excess heat recovery              | Number of units | Accessible heat |
|---------------------------------------------|-----------------|-----------------|
| Data centers                                | 985             | 269.4           |
| Metro stations                              | 1 767           | 27.7            |
| Food production                             | 554             | 3.7             |
| Food retail                                 | 16 833          | 49.9            |
| Buildings – service sector                  | <sup>1</sup>    | 221.4           |
| Buildings – residential sector              | <sup>1</sup>    | 103.5           |
| Sewage water (waste-water treatment plants) | 2 617           | 497.7           |
| Total                                       |                 | 1173.3          |

<sup>1</sup> based on cooling demand of the building stock

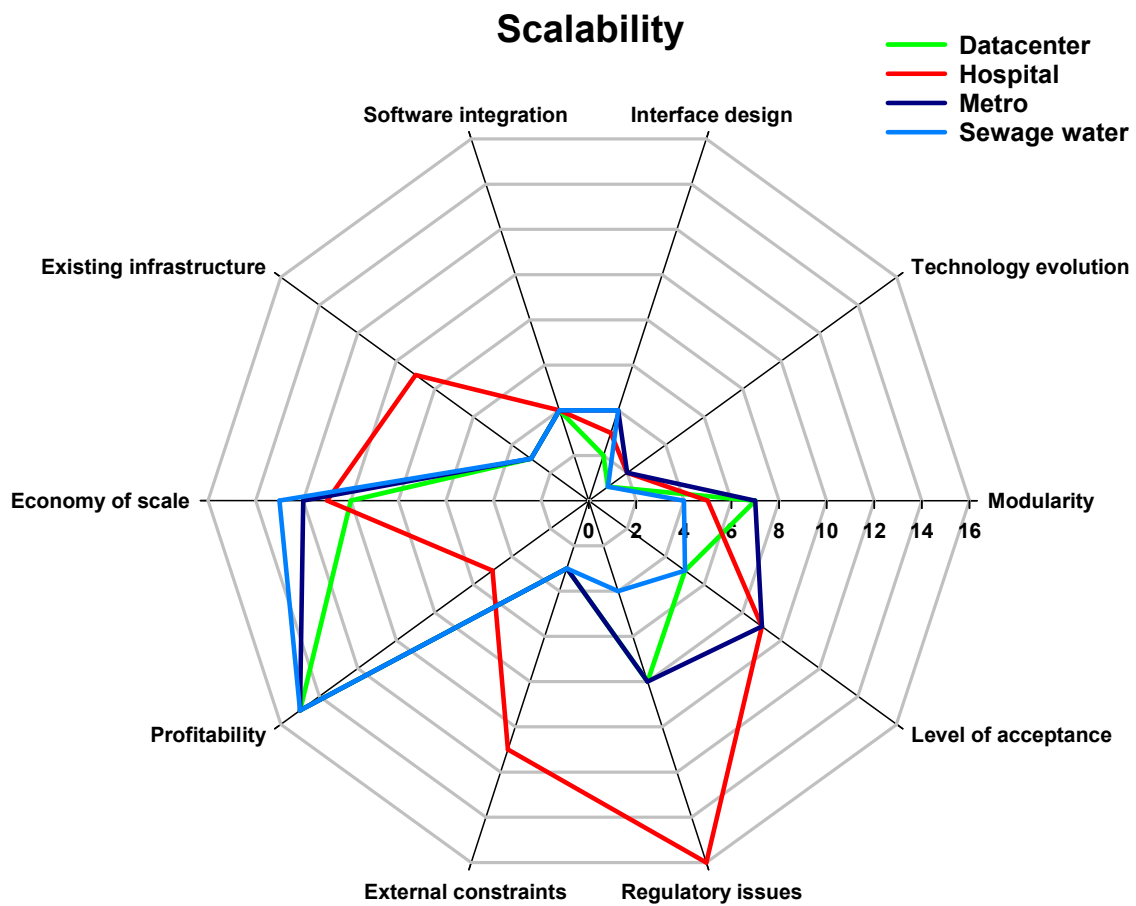

**Figure S1.** Computed Scalability factors.

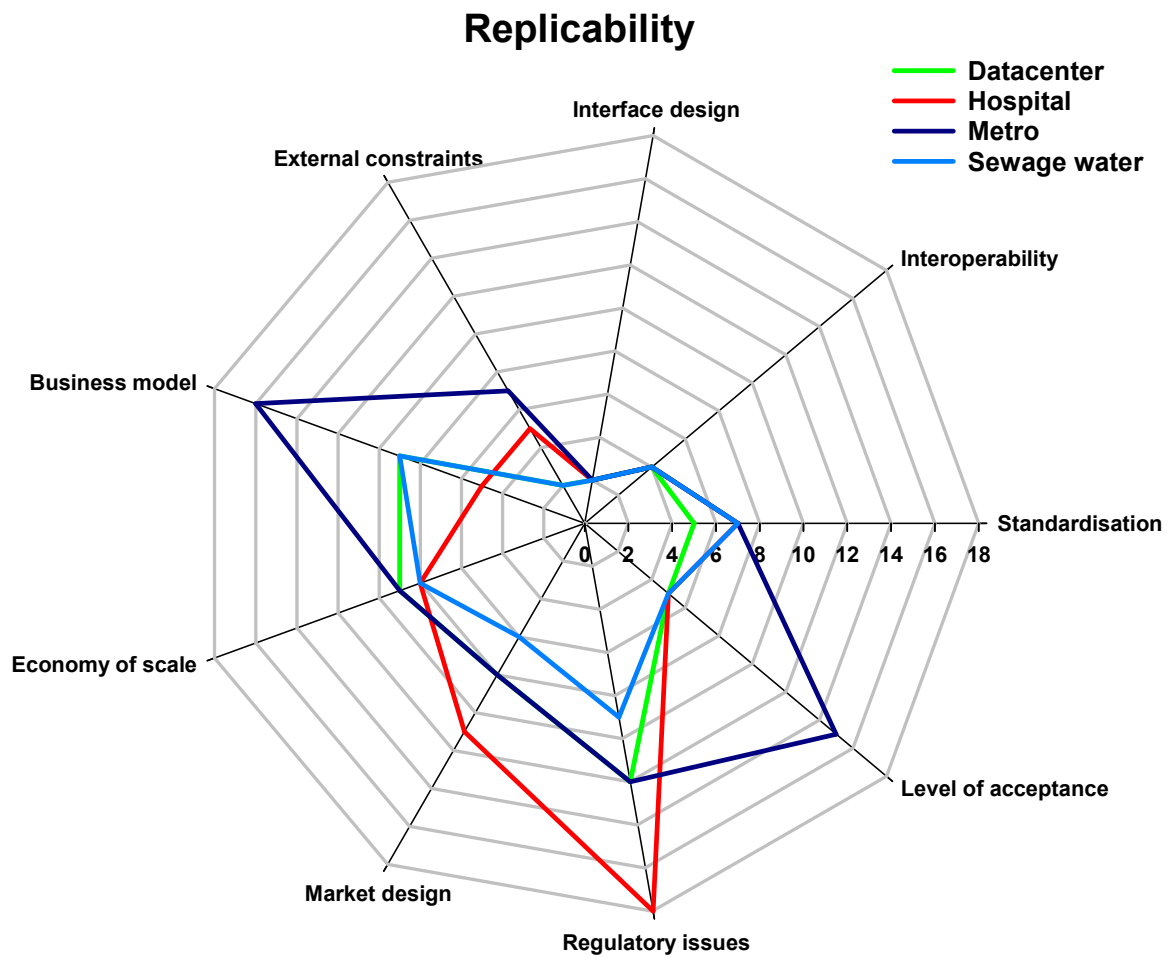

**Figure S2.** Computed Replicability factors.



## Levelized costs of heat - Germany

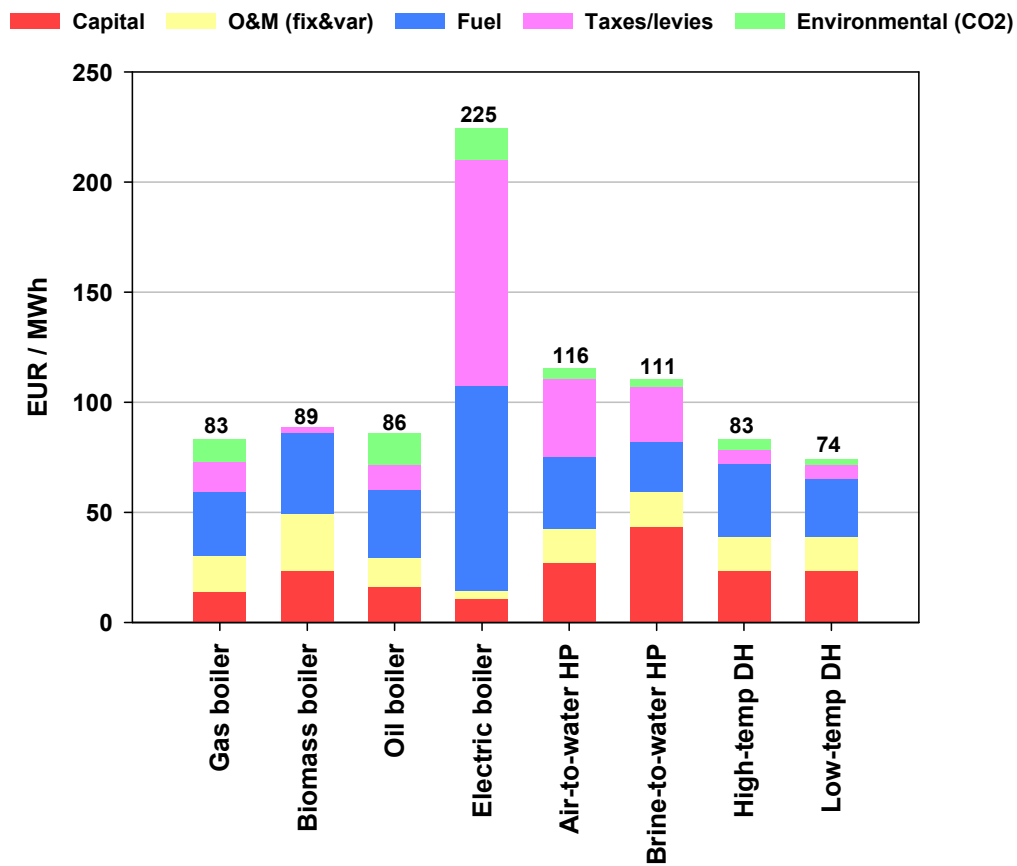

**Figure S3.** The LCOH estimations for the analysed heat supply options for Germany.

## Levelized costs of heat - Spain

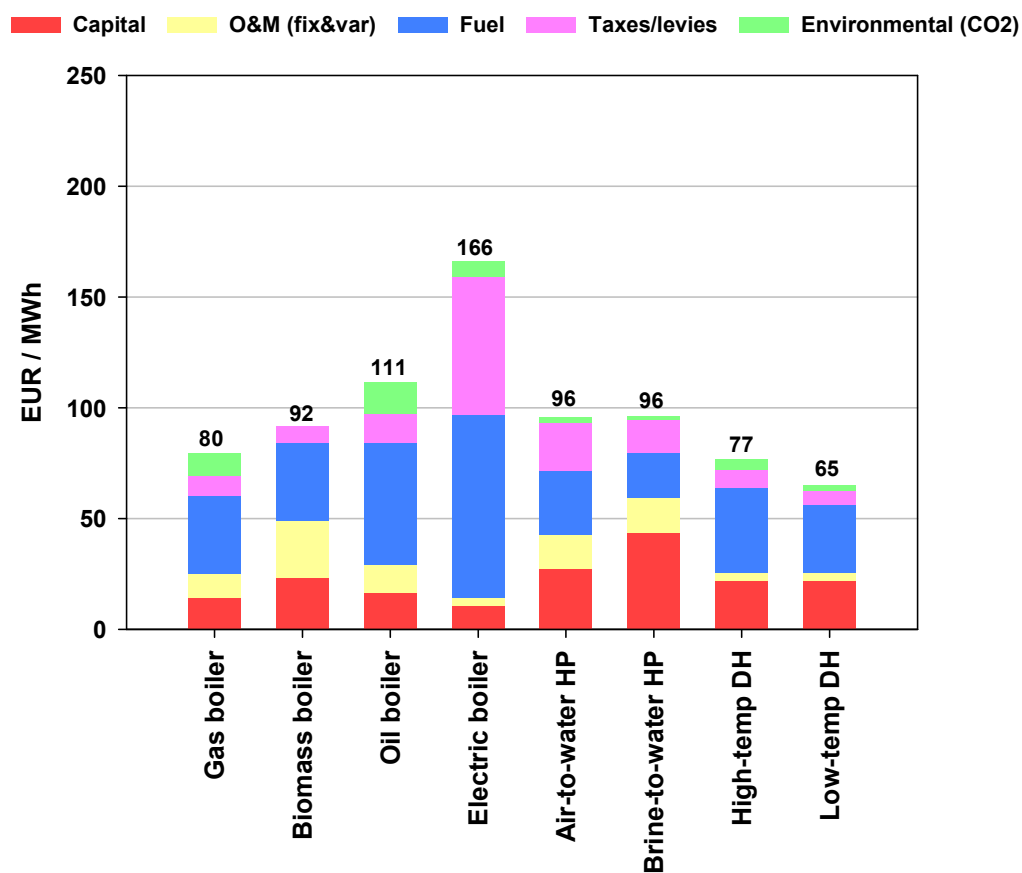

**Figure S4.** The LCOH estimations for the analysed heat supply options for Spain.

## Levelized costs of heat - France

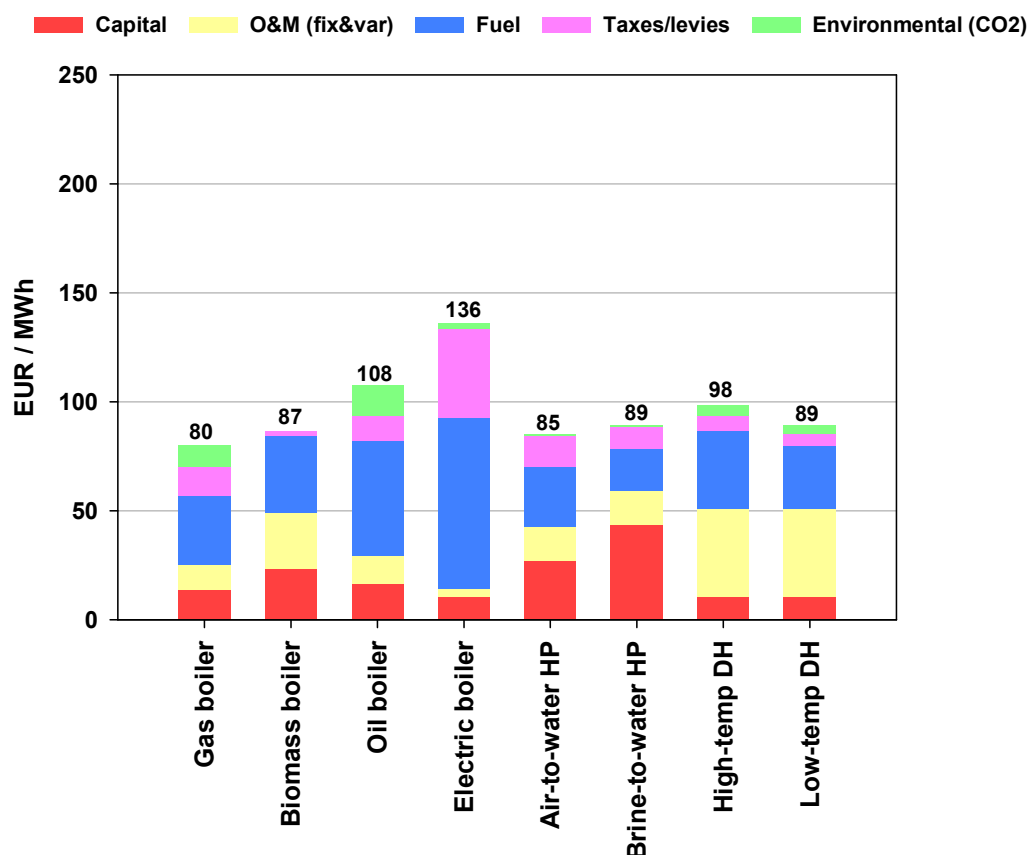

**Figure S5.** The LCOH estimations for the analysed heat supply options for France.

### Supplementary references

- S1. IEA—International Energy Agency. World Energy Model. Macro Drivers. Available on-line: <https://www.iea.org/reports/world-energy-model/macro-drivers> (accessed on 26 July 2022).
- S2. Danish Energy Agency. Technology Data. Available on-line: <https://ens.dk/en/our-services/projections-and-models/technology-data> (accessed on 26 July 2022).
- S3. Hansen, C.H.; Gudmundsson, O. The-Competitiveness-of-District-Heating-Compared-to-Individual-Heatingv2. 2018. Available online: <https://www.danskfjernvarme.dk/-/media/danskfjernvarme/gronenergi/analyser/03052018-the-competitiveness-of-district-heating-compared-to-individual-heatingv2.pdf> (accessed on 26 July 2022).
- S4. Greenhouse Gas Emission Intensity of Electricity Generation in Europe. Available on-line: <https://www.eea.europa.eu/ims/greenhouse-gas-emission-intensity-of-1> (accessed on 26 July 2022).

- S5. Schüppler, S.; Fleuchaus, P.; BlumP. Techno-economic and environmental analysis of an Aquifer Thermal Energy Storage (ATES) in Germany. *Geotherm. Energy* **2019**, *7*, 11. <https://doi.org/10.1186/s40517-019-0127-6>.
- S6. Malaich, B.; Oschatz, B. BDEW-Heizkostenvergleich Altbau 2021. Ein Vergleich der Gesamtkosten verschiedener Systeme zur Heizung und Warmwasserbereitung in Altbauten. 2021. Available on-line: [https://www.bdew.de/media/documents/BDEW-HKV\\_Altbau.pdf](https://www.bdew.de/media/documents/BDEW-HKV_Altbau.pdf) (accessed on 26 July 2022).
- S7. Großklos, M. Kumulierter Energieaufwand und CO<sub>2</sub>-Emissionsfaktoren Verschiedener Energieträger und–Versorgungen. 2020. Available online: <https://www.iwu.de/fileadmin/tools/kea/kea.pdf> (accessed on 26 July 2022).
- S8. Miara, M.; Günther, D.; Kramer, T.; Oltersdorf, T.; Wapler, J. Wärmepumpen effizienz. Messtechnische Untersuchung von Wärmepumpenanlagen zur Analyse und Bewertung der Effizienz in realen Betrieb. 2011. Available online: [https://wp-monitoring.ise.fraunhofer.de/wp-effizienz/download/wp\\_effizienz\\_endbericht\\_langfassung.pdf](https://wp-monitoring.ise.fraunhofer.de/wp-effizienz/download/wp_effizienz_endbericht_langfassung.pdf) (accessed on 26 July 2022).
- S9. Zukunftsheizen. Available online: <https://www.zukunftsheizen.de/brennstoff/zusammensetzung-heizoelpreis/> (accessed on 26 July 2022).
- S10. Bundesministerium für Wirtschaft und Klimaschutz. Staatlich veranlasste Bestandteile des Gaspreises. Available online: [https://www.bmwi.de/Redaktion/DE/Artikel/Energie/gaspreise-bestandteile-staatlich.html#:~:text=Die%20Energiesteuer%20\(Gassteuer\)%20f%C3%BCr%20die,und%20flie%C3%9Ft%20in%20den%20Bundeshaushalt](https://www.bmwi.de/Redaktion/DE/Artikel/Energie/gaspreise-bestandteile-staatlich.html#:~:text=Die%20Energiesteuer%20(Gassteuer)%20f%C3%BCr%20die,und%20flie%C3%9Ft%20in%20den%20Bundeshaushalt) (accessed on 26 July 2022).
- S11. Eurostat—Statistics Explained. Electricity Prices for Household Consumers, First Half 2021 v5. Available online: [https://ec.europa.eu/eurostat/statistics-explained/index.php?title=File:Electricity\\_prices\\_for\\_household\\_consumers,\\_first\\_half\\_2021\\_v5.png#file](https://ec.europa.eu/eurostat/statistics-explained/index.php?title=File:Electricity_prices_for_household_consumers,_first_half_2021_v5.png#file) (accessed on 26 July 2022).
- S12. Eurostat—Statistics Explained. Electricity Prices for Household Consumers, First Half 2021 v1. Available on-line: [https://ec.europa.eu/eurostat/statistics-explained/index.php?title=File:Natural\\_gas\\_prices\\_for\\_household\\_consumers,\\_first\\_half\\_2021\\_v1.png](https://ec.europa.eu/eurostat/statistics-explained/index.php?title=File:Natural_gas_prices_for_household_consumers,_first_half_2021_v1.png) (accessed on 26 July 2022).
- S13. AGFW—Der Energieeffizienzverband für Wärme, Kälte und KWK. Available online: <https://ag-energiebilanzen.de/mitglied/agfw-der-energieeffizienzverband-fuer-waerme-kaelte-und-kwk-e-v/> (accessed on 26 July 2022).
- S14. Resolution BOE-A-2020-11426. Ministerio para la Transición Ecológica y el Reto Demográfico. Resolución de 29 de septiembre de 2020, de la Dirección General de Política Energética y Minas, por la que se publica la tarifa de último recurso de gas natural. Available online: [https://www.boe.es/diario\\_boe/txt.php?id=BOE-A-2020-11426](https://www.boe.es/diario_boe/txt.php?id=BOE-A-2020-11426) (accessed on 26 July 2022).
- S15. Precios de los Derivados del Petróleo: España. Available online: <https://datosmacro.expansion.com/energia/precios-gasolina-diesel-calefaccion/espana> (accessed on 26 July 2022).

- S16. Precio neto de la Electricidad para uso Doméstico y uso Industrial—Euros/kWh.  
Available online: [https://www.mincotur.gob.es/es-es/IndicadoresyEstadisticas/BoletinEstadistico/Energ%C3%ADa%20y%20emisiones/4\\_12.pdf](https://www.mincotur.gob.es/es-es/IndicadoresyEstadisticas/BoletinEstadistico/Energ%C3%ADa%20y%20emisiones/4_12.pdf) (accessed on 26 July 2022).
- S17. ADEME Agence de la Transition Écologique. Available online:  
<https://librairie.ademe.fr/energies-renouvelables-reseaux-et-stockage/818-reseaux-de-chaleur-et-de-froid-etat-des-lieux-de-la-filiere-marches-emplois-couts.html> (accessed on 26 July 2022).
